# Supplementary material for: A rapid nucleic acid concentration measurement system with large field of view for a droplet digital PCR microfluidic chip
Source: Royal Society of Chemistry journal article supplement (doi:10.1039/d1lc00532d), 2021-01-01
Supplement: d1lc00532d1.pdf [file d1lc00532d1.pdf]

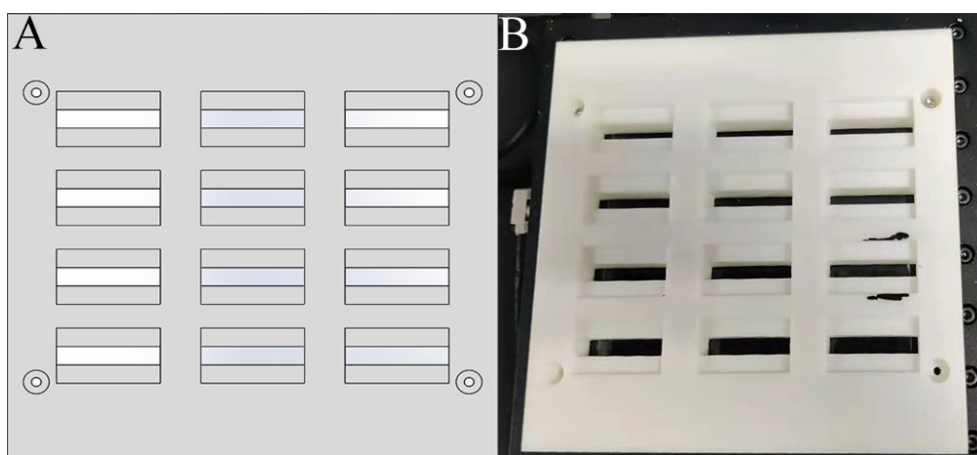

Fig.S1 The simulation diagram and physical diagram of working stage that can hold 12 ddPCR chips.

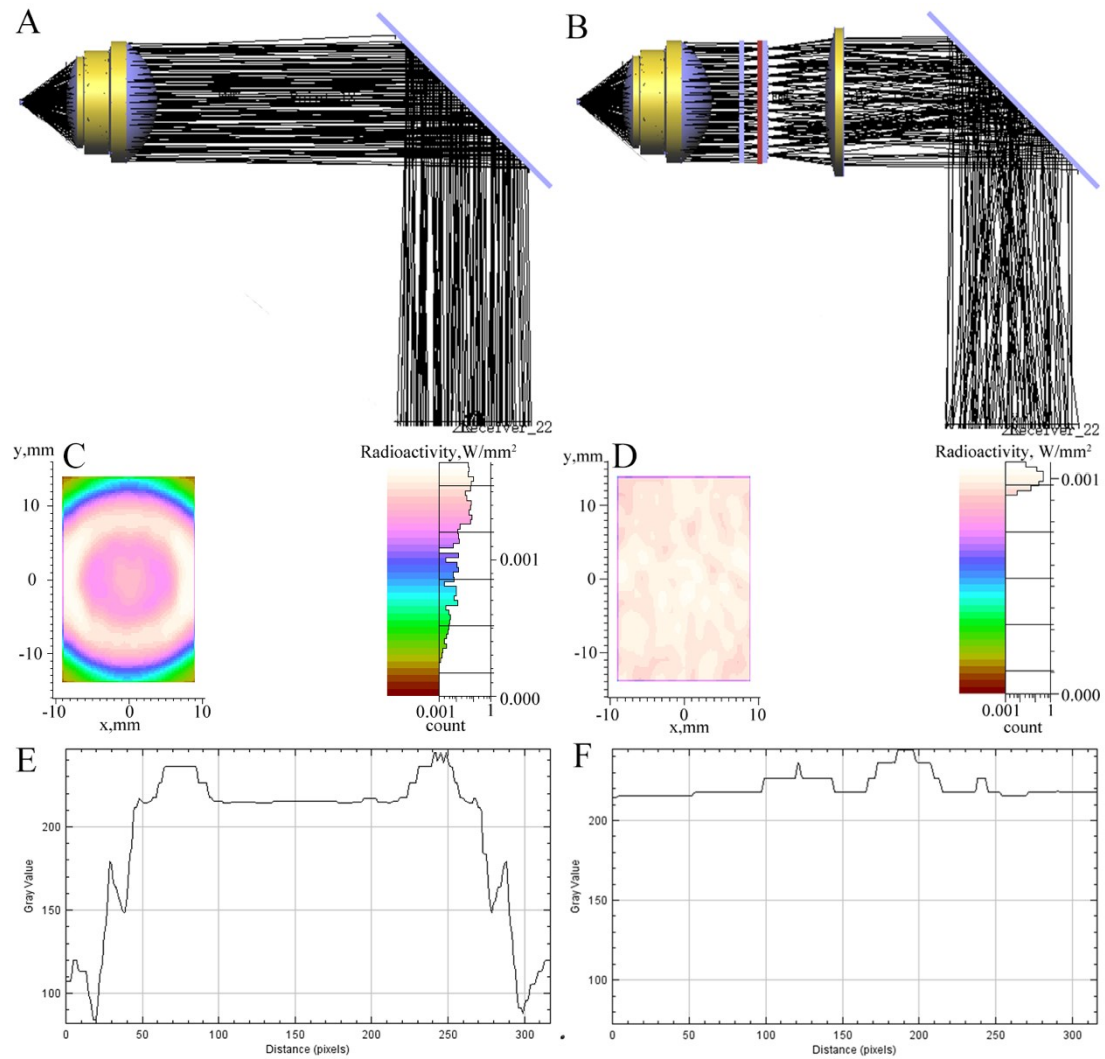

Fig S2 (A) Simulated light path diagram of traditional lighting system, (B) Simulated light path diagram of compound eye lighting system, (C) Simulate light uniformity map of traditional lighting system, (D) Illumination uniformity map of simulated compound eye lighting system, (E) Gray value of traditional lighting system diagram, (F) Gray value of compound eye lighting system diagram.

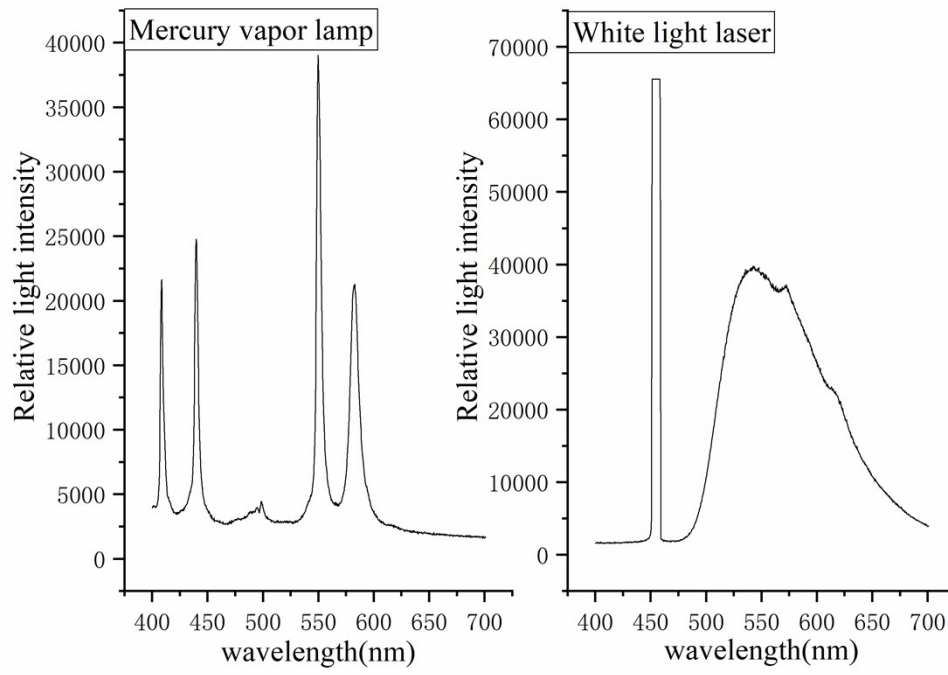

Fig.S3 The spectrum of the white light laser and mercury vapor

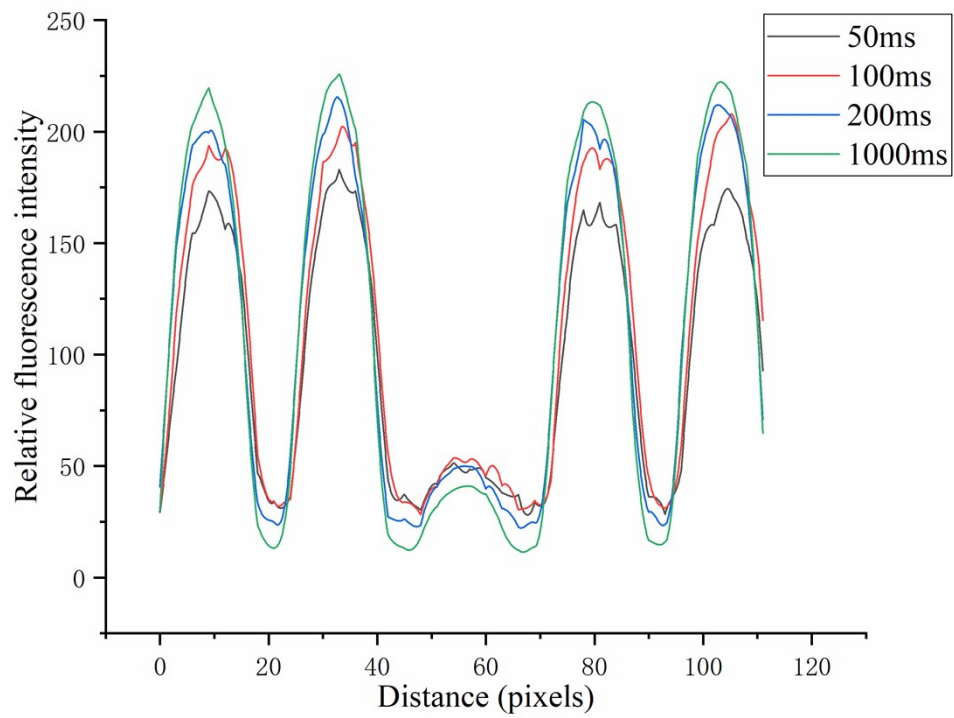

Fig.S4 Fluorescence intensity analysis of the micro reaction chamber at different exposure times.

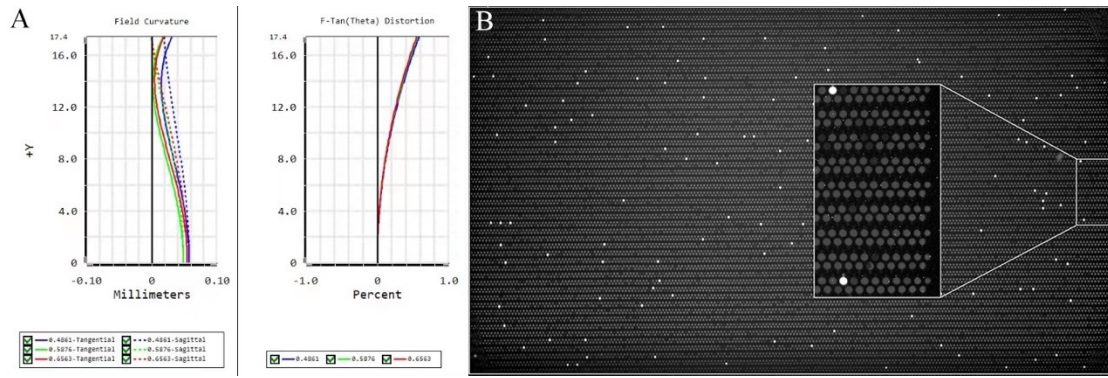

Fig S5 (A)Field curvature and distortion, (B) The micro chambers at the edge of the picture

## Table Captions

**Table S1** The specific values of the different light source in different cases.

| Light source      | Total light intensity | At 525nm | At 571nm | HEX   | ROX    |
|-------------------|-----------------------|----------|----------|-------|--------|
| White light laser | 0.554W                | 53.4mW   | 64.2mW   | 2.2mW | 2.74mW |
| mercury vapor     | 0.548W                | 8.63mW   | 61.8mW   | 0.5mW | 5.49mW |

**Table S2** The data analysis of different lighting methods

| Concrete parameter      | Traditional lighting system | Compound eye lighting system |
|-------------------------|-----------------------------|------------------------------|
| maximum gray value      | 244.3                       | 244.3                        |
| minimum gray value      | 91                          | 222.5                        |
| illumination uniformity | 54.27%                      | 95.33%                       |

**Table S3** Parameters of compound eye lens array

| Half width of microlens in X direction /mm | Half width of microlens in Y direction /mm | thickness /mm | Radius of curvature /mm | Materials |
|--------------------------------------------|--------------------------------------------|---------------|-------------------------|-----------|
| 0.55                                       | 0.85                                       | 1             | 2.9                     | PMMA      |

**Table S4** The statistical data of the droplet digital PCR assay

| Expected concentration (copies/ $\mu$ L) | Experiment 1 |                               | Experiment 2 |                               | Experiment 3 |                               | Average (calculated concentration) (copies/ $\mu$ L) |
|------------------------------------------|--------------|-------------------------------|--------------|-------------------------------|--------------|-------------------------------|------------------------------------------------------|
|                                          | $d_1$        | $\lambda_1$ (copies/ $\mu$ L) | $d_2$        | $\lambda_2$ (copies/ $\mu$ L) | $d_3$        | $\lambda_3$ (copies/ $\mu$ L) |                                                      |
| $1 \times 10^1$                          | 15           | $1.10 \times 10^1$            | 24           | $1.70 \times 10^1$            | 17           | $1.20 \times 10^1$            | $1.33 \times 10^1$                                   |
| $1 \times 10^2$                          | 156          | $1.10 \times 10^2$            | 180          | $1.27 \times 10^2$            | 141          | $0.90 \times 10^2$            | $1.09 \times 10^2$                                   |
| $1 \times 10^3$                          | 1631         | $1.20 \times 10^3$            | 1583         | $1.10 \times 10^3$            | 1716         | $1.28 \times 10^3$            | $1.23 \times 10^3$                                   |
| $1 \times 10^4$                          | 9329         | $0.93 \times 10^4$            | 10199        | $1.06 \times 10^4$            | 9129         | $1.03 \times 10^4$            | $1.01 \times 10^4$                                   |
| $1 \times 10^5$                          | 19110        | $1.04 \times 10^5$            | 19091        | $1.16 \times 10^5$            | 19117        | $0.91 \times 10^5$            | $1.04 \times 10^5$                                   |
